# Supplementary material for: Large-scale fabrication of porous bulk silver thin sheets with tunable porosity for high-performance binder-free supercapacitor electrodes
Source: Royal Society of Chemistry journal article supplement (doi:10.1039/c5ra06679d), 2015-01-01
Supplement: c5ra06679d1.pdf [file c5ra06679d1.pdf]

## Supplementary Information

### **Large-scale fabrication of porous bulk silver thin sheets with tunable porosity for high-performance binder-free supercapacitor electrodes†**

Xiangyu Wang, Pinghui Zhang, Sascha Vongehr, Shaochun Tang,\* Yongguang Wang, Xiangkang Meng\*

*Institute of Materials Engineering, National Laboratory of Solid State Microstructures, and College of Engineering Applied Sciences, Nanjing University, Jiangsu, P. R. China*

\* Correspondence and requests for materials should be addressed to S.C. Tang ([tangsc@nju.edu.cn](mailto:tangsc@nju.edu.cn)) or X.K. Meng ([mengxk@nju.edu.cn](mailto:mengxk@nju.edu.cn)).

#### **Figure captions:**

**Fig. S1** SEM images showing surface morphology of a pressed silver thin sheet before etching.

**Fig. S2** SEM images of the products after 5 min etching of (a) a silver sheet obtained by pressing silver NPs, and (b) a commercial silver sheet.

**Fig. S3** XRD pattern of the PSTS/Co<sub>3</sub>O<sub>4</sub> composite obtained with a Co<sup>2+</sup> concentration of 20 mM.

**Fig. S4** CD curves at different current densities of the optimal PSTS/Co<sub>3</sub>O<sub>4</sub> composite electrode with the Co<sub>3</sub>O<sub>4</sub> loading of 2.9 mg/cm<sup>2</sup>.

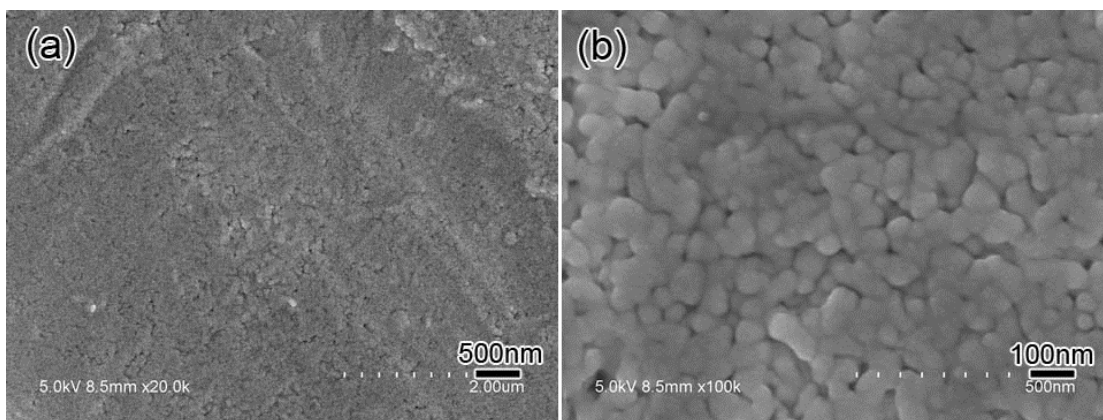

**Fig. S1** SEM images showing surface morphology of a pressed silver thin sheet before etching.

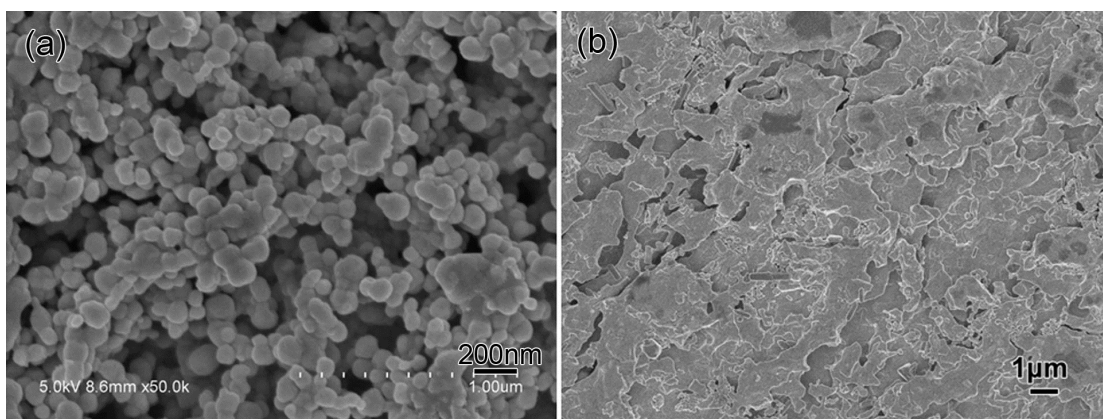

**Fig. S2** SEM images of the products after 5 min etching of (a) a silver sheet obtained by pressing silver NPs, and (b) a commercial silver sheet.

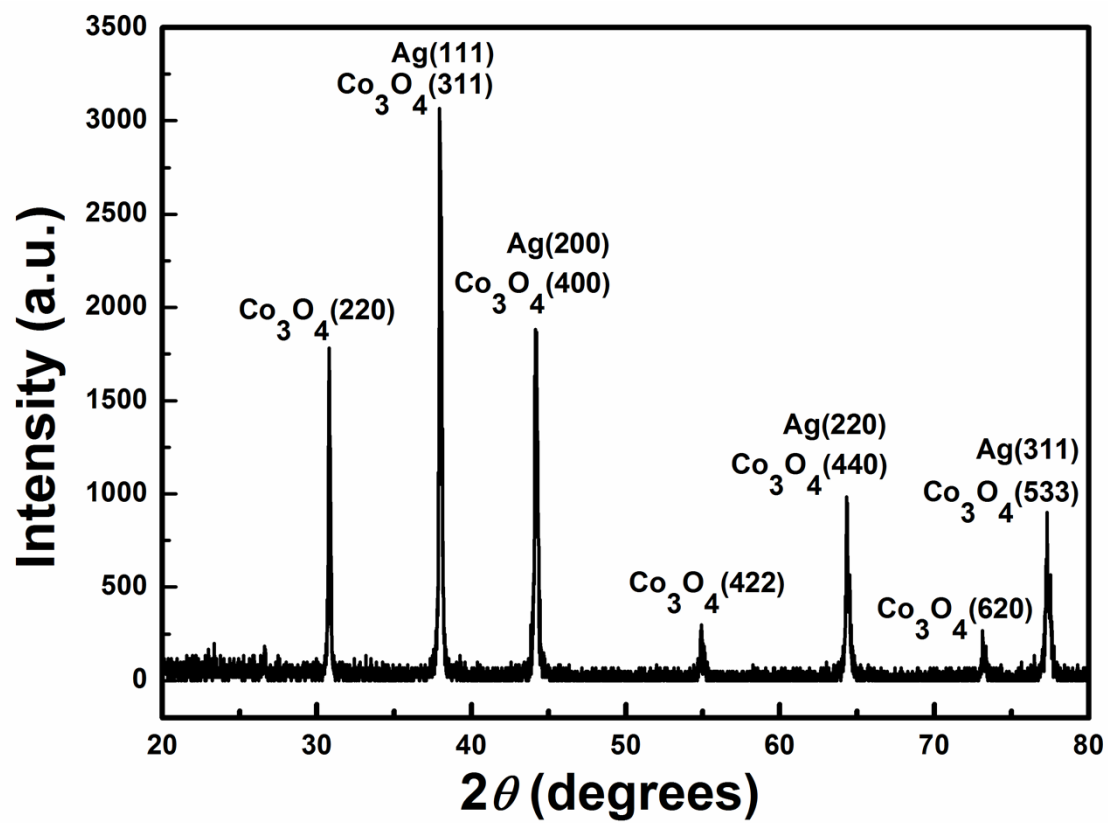

Fig. S3 XRD pattern of the PSTS/Co<sub>3</sub>O<sub>4</sub> composite obtained with a Co<sup>2+</sup> concentration of 20 mM.

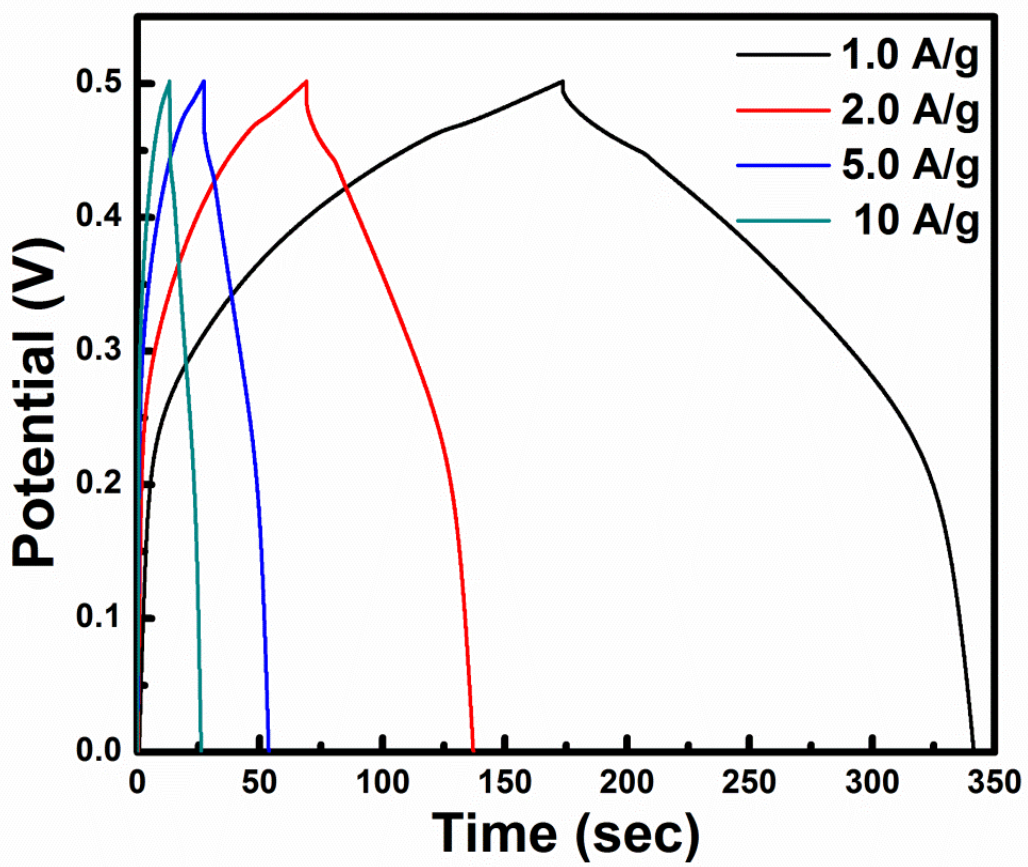

**Fig. S4** CD curves at different current densities of the optimal PSTS/Co<sub>3</sub>O<sub>4</sub> composite electrode with the Co<sub>3</sub>O<sub>4</sub> loading of 2.9 mg/cm<sup>2</sup>.
